# Supplementary material for: High quality graphene films with a clean surface prepared by an UV/ozone assisted transfer process
Source: Royal Society of Chemistry journal article supplement (doi:10.1039/c6tc05505b), 2017-01-01
Supplement: c6tc05505b1.pdf [file c6tc05505b1.pdf]

## SUPPORTING INFORMATION

### **High quality graphene films with clean surface prepared by UV/ozone assisted transfer process**

Hongyan Sun,<sup>a,b</sup> Ding Chen<sup>a\*</sup>, Yuming Wu,<sup>b</sup> Qilong Yuan,<sup>b</sup> Liangchao Guo,<sup>b</sup> Dan  
Dai,<sup>b</sup> Yang Xu,<sup>c</sup> Pei Zhao,<sup>d</sup> Nan Jiang,<sup>b\*</sup> Cheng-Te Lin<sup>b\*</sup>

<sup>a</sup> College of Materials Science and Engineering, Hunan University, Changsha 410082, PR China.

E-mail: chending@hnu.edu.cn

<sup>b</sup> Key Laboratory of Marine Materials and Related Technologies, Zhejiang Key Laboratory of Marine Materials and Protective Technologies, Ningbo Institute of Materials Technology and Engineering (NIMTE), Chinese Academy of Sciences, Ningbo 315201, China. E-mail: linzhengde@nimte.ac.cn; jiangnan@nimte.ac.cn

<sup>c</sup> Engineering and State Key Laboratory of Silicon Materials, Zhejiang University, Hangzhou, Zhejiang, 310027, China

<sup>d</sup> Institute of Applied Mechanics and Key Laboratory of Soft Machines and Smart Devices of Zhejiang Province, Zhejiang University, Hangzhou 310012, P. R. China

*\*Corresponding author,*

## SUPPLEMENT

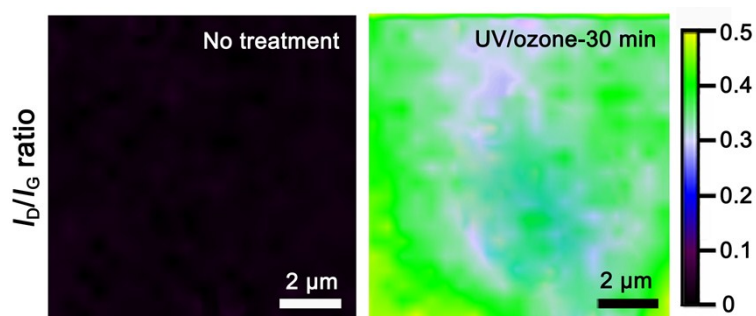

**Fig. S1.** Raman mapping of  $I_D/I_G$  ratio for the bottom graphene.

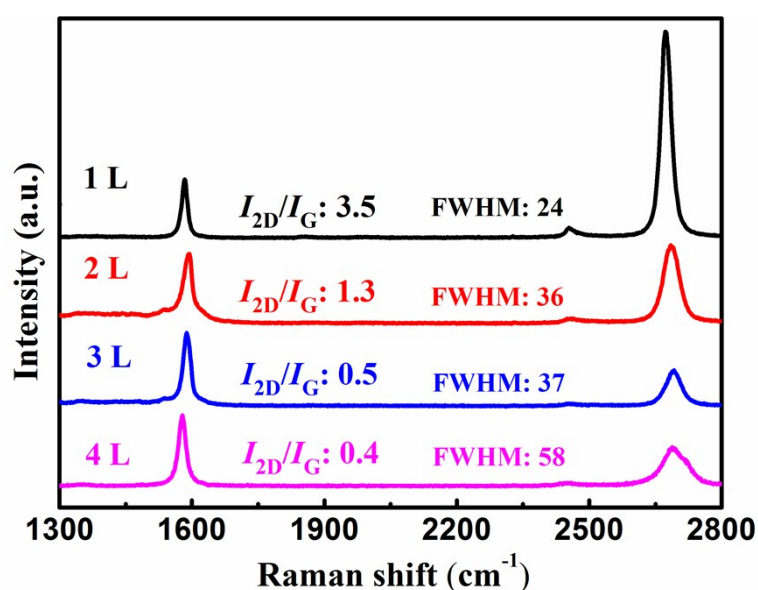

**Fig. S2.** Raman spectra of graphene with 1, 2, 3, and 4 layer(s).

**Fig. S2** exhibits the Raman spectra of graphene with 1, 2, 3, and 4 layer(s). The quality of transferred graphene sheets was checked with Raman spectroscopy, as shown in Figure 2b. The sharp 2D peaks at around  $2700\text{ cm}^{-1}$  indicate that the single-layer graphene sheets are still intact. As the layer number increases, the intensity of the 2D peak decreases and the FWHM broaden as expected.<sup>1</sup>

## References

1. W. H. Lin, T. H. Chen, J. K. Chang, J. Taur, Y. Y. Lo, W. L. Lee, C. S. Chang, W. B. Su and C. Wu, *Acs Nano*, 2014, **8**, 1784-1791.
